# Supplementary material for: Serum miR-22 as potential non-invasive predictor of poor clinical outcome in newly diagnosed, uniformly treated patients with diffuse large B-cell lymphoma: an explorative pilot study
Source: Springer Nature journal article supplement (doi:10.1186/s13046-018-0768-5), 2018-05-01

# Supplementary figure 1

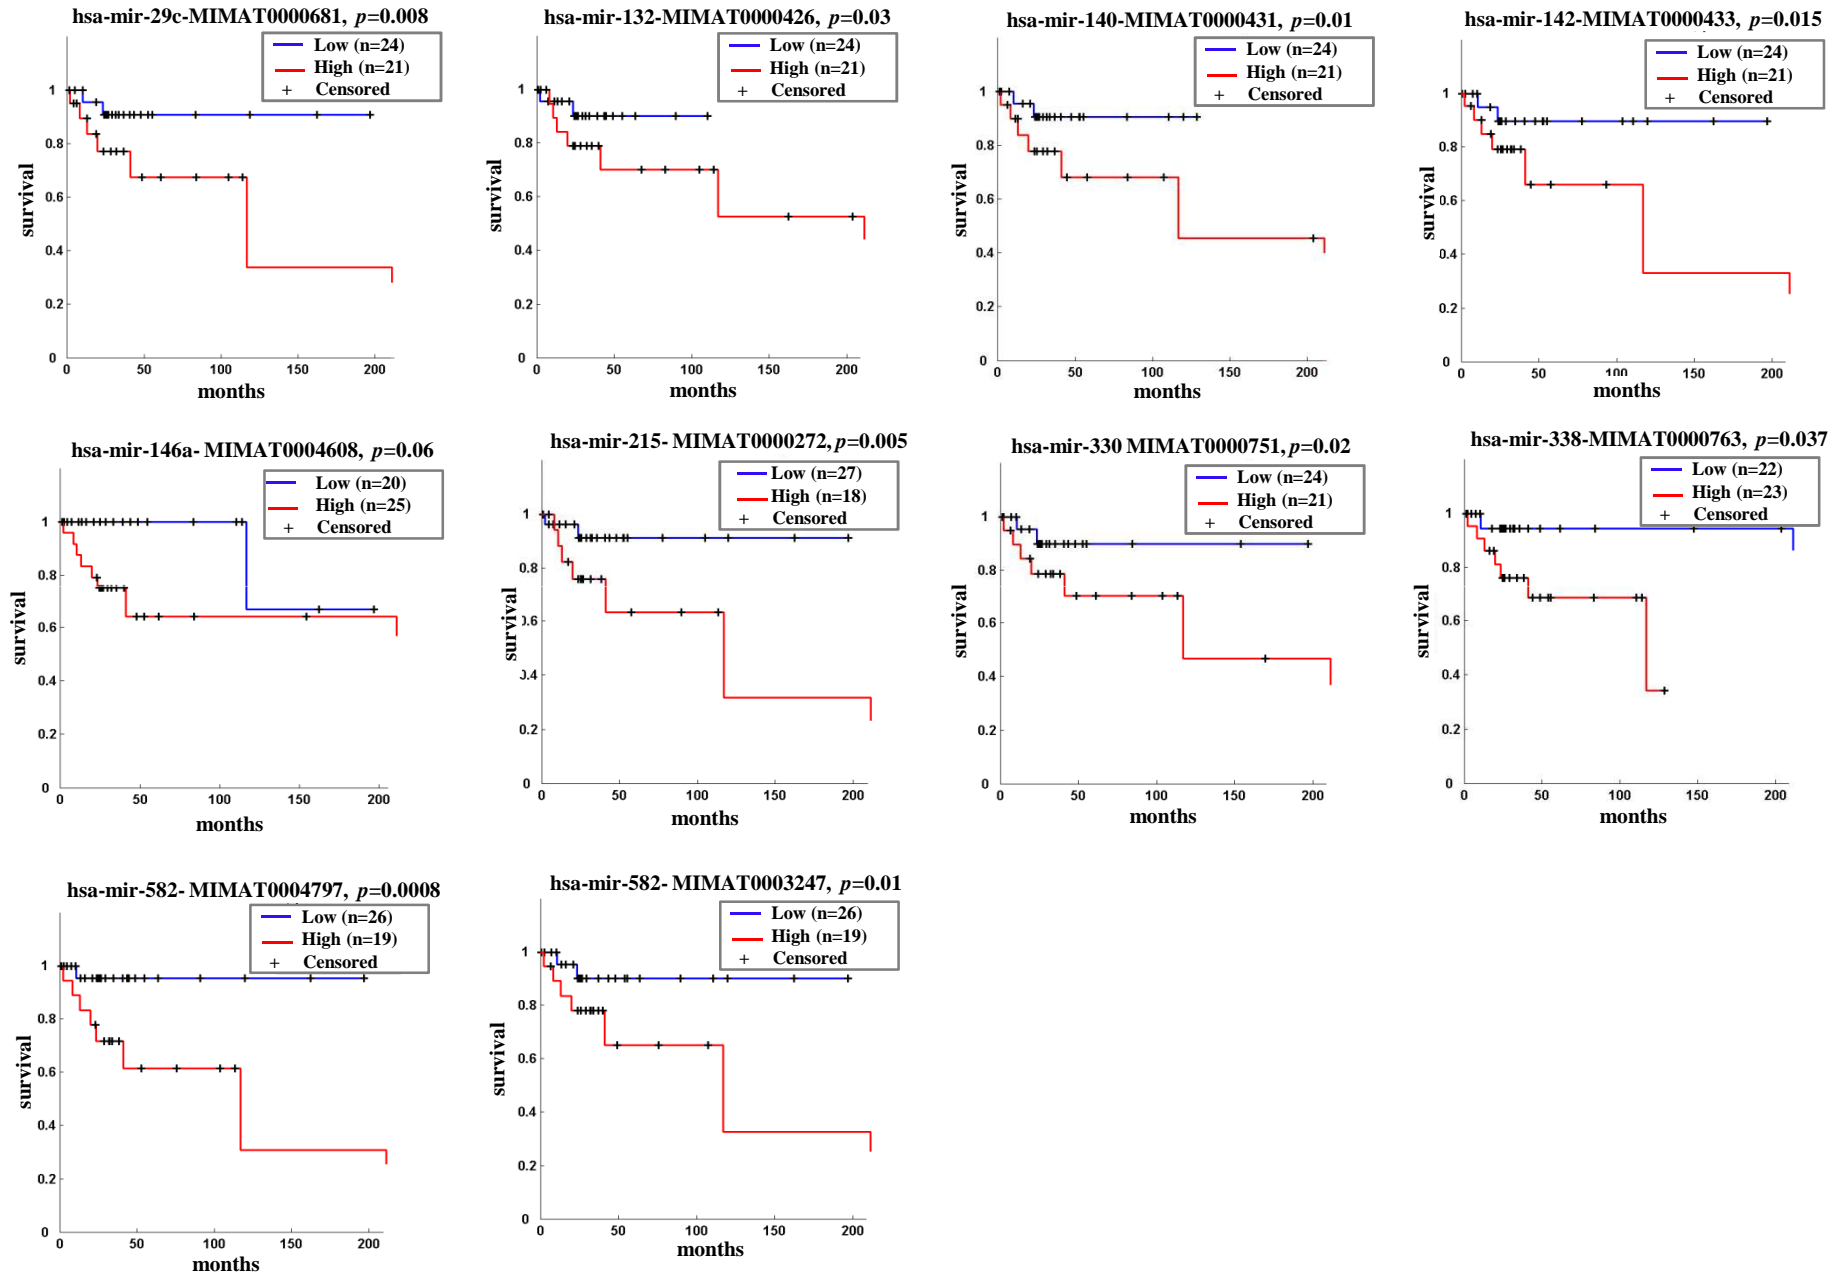

Supplement: MOESM1 [file 15733430]
